# Supplementary material for: Experiences of the HIV Cascade of Care Among Indigenous Peoples: A Systematic Review
Source: Springer Nature journal article supplement (doi:10.1007/s10461-018-2372-2), 2019-01-01
Supplement: 10461_2018_2372_MOESM1_ESM.pdf [file 10461_2018_2372_MOESM1_ESM.pdf]

| TESTING & DIAGNOSIS                               |              |                               |                             |                       |                         |                                                                                                                                                                                                                                                                                                                                                             |
|---------------------------------------------------|--------------|-------------------------------|-----------------------------|-----------------------|-------------------------|-------------------------------------------------------------------------------------------------------------------------------------------------------------------------------------------------------------------------------------------------------------------------------------------------------------------------------------------------------------|
| First Author, Publication Year                    | Study Period | Design                        | Location                    | Population            | Sample Indigenous n (%) | Key Cascade Findings                                                                                                                                                                                                                                                                                                                                        |
| DuBois 1996                                       | 1994         | cross-sectional               | CAN: Montreal               | Urban                 | 99 (100)                | <b>Proportion ever tested:</b> 48.5%                                                                                                                                                                                                                                                                                                                        |
| Connor 1997                                       | 1991-1992    | cross-sectional               | NZ: Auckland / Christchurch | STD clinic attenders  | 1363 (16.1)             | <b>Odds of testing among men, vs European Maori:</b> 0.6; Pacific islander: 0.3; Other: 1.1<br><b>Odds of testing among women, vs European Maori:</b> 0.6; Pacific islander: 0.2; Other: 1.7                                                                                                                                                                |
| Miller 1998                                       | 1994-1996    | cohort (population)           | AUS: Anangu Pitjantjatjara  | Adults                | 592 (100)               | <b>Tests per year:</b> 1994: 83 --> 1996: 592 (24% of pop) with SCI: 31% without SCI: 60%                                                                                                                                                                                                                                                                   |
| Krause 1999                                       | 1996         | cross-sectional               | US: Western Mountain Region | Co-morbid (SCI) men   | 672 (100)               | Significant difference (p<0.05)                                                                                                                                                                                                                                                                                                                             |
| Martin 2002                                       | 1992-2000    | cohort                        | CAN: BC                     | Substance use         | 2345 (100)              | <b>Proportion tested while in drug Tx:</b> 67%                                                                                                                                                                                                                                                                                                              |
| Mak 2003                                          | 1997-2002    | cohort (population)           | AUS: Western                | Perinatal             | 1903 (66.0)             | <b>Model:</b> Aboriginal ethnicity not significantly associated with HIV testing                                                                                                                                                                                                                                                                            |
| Denny 2003                                        | 1998-2000    | cross-sectional (BRFSS)       | US: National                | Adults                | 4854 (2.2)              | <b>Proportion never tested:</b> 50.5% (47.6%-53.4%)<br><i>Significantly lower than non-AIAN</i>                                                                                                                                                                                                                                                             |
| Wang 2005                                         | 2000         | cross-sectional (population)  | CAN: Alberta                | Perinatal             | 2549 (6.6)              | <b>Proportion opting out of prenatal testing:</b> 55 (2.2%)<br><b>Model:</b> First Nations more likely to opt out AOR: 1.91; 95%CI: 1.42-2.58                                                                                                                                                                                                               |
| Foley 2005                                        | 2002-2004    | intervention                  | US: Southwest               | Substance use         | 134 (100)               | <b>Proportion tested in drug Tx:</b> 105/134 (78.4%)                                                                                                                                                                                                                                                                                                        |
| Wardman 2006                                      | 2003         | cross-sectional               | CAN: BC                     | Engaged               | 219 (100)               | <b>Proportion ever tested:</b> 60.4%                                                                                                                                                                                                                                                                                                                        |
| Lapidus 2006                                      | 2001         | cross-sectional               | US: Portland                | Adults                | 222 (100)               | <b>Proportion tested in past year:</b> 79/218 (36%)<br><b>Proportion ever tested:</b> 180/218 (82.6%)                                                                                                                                                                                                                                                       |
| Sanchez 2006                                      | 2003-2005    | cross-sectional (NHBS)        | US: National                | MSM                   | 40 (0.4)                | <b>Proportion tested in past year:</b> 31 (77.5%)<br><b>Proportion ever tested:</b> 38 (95%)                                                                                                                                                                                                                                                                |
| Plitt 2009                                        | 1998-2003    | cohort (NAHIVP)               | CAN: Northern Alberta       | newly diagnosed PLWHA | 216 (41.1)              | <b>Proportion with a late diagnosis (CD4 &lt;200):</b> 49 (38%)<br><i>No different than non-Indigenous p=0.20</i>                                                                                                                                                                                                                                           |
| Long 2010                                         | 2003-2008    | cohort (population)           | CAN: Alberta                | Co-morbid (TB)        | 97 (12.5)               | <b>Proportion tested in routine screening in TB care:</b> 86 (89%)                                                                                                                                                                                                                                                                                          |
| Orchard 2010                                      | 2001         | cross-sectional (APS)         | CAN: National               | Off-reserve           | 520493 (100)            | <b>Proportion tested in past year:</b> 13.2%<br><b>Proportion ever tested:</b> 41.7%                                                                                                                                                                                                                                                                        |
| Worthington 2010; Mill 2008 & 2011; Prentice 2011 | 2004-2005    | cross-sectional               | CAN: National               | Youth                 | 413 (100)               | <b>Proportion ever tested:</b> 210/413 (51%)<br><b>Proportion with late diagnosis:</b> 6/26 (23.1%)<br><b>Proportion ever tested:</b> 43.0%<br>Men: 40.3%; Women 46.8%                                                                                                                                                                                      |
| Barnes 2010                                       | 2004-2008    | cross-sectional (NHIS)        | US: National                | Adults                | 793 (0.6)               | <b>Model:</b> AI/AN more likely than other ethnicities to be tested for HIV<br><b>Estimated number of undiagnosed</b> 1200 (25.8%; 95%CI: 600-1800)<br>60.4 per 100,000 people (95%CI: 25.1-95.6)                                                                                                                                                           |
| Campsmith 2010                                    | 2006         | mathematical modeling         | US: National                | General               | 4600 (0.4)              | <b>Model:</b> AI/AN more likely to be undiagnosed vs. white (1.52; 95%CI: 1.43-1.64)                                                                                                                                                                                                                                                                        |
| Hodge 2010                                        | ?            | cross-sectional               | US: California              | General               | 457 (100)               | <b>Proportion ever tested:</b> 171/423 (40.4%)                                                                                                                                                                                                                                                                                                              |
| Sawleshwarkar 2011                                | 2000-2010    | cross-sectional (BEACH)       | AUS: National               | Health care providers | 13114 (1.3)             | <b>Testing rate per 100 encounters:</b> 5.57 (95%CI: 3.97-7.16)<br><b>Model:</b> Indigenous more likely to be tested (AOR:1.74; 95%CI:1.26-2.41)                                                                                                                                                                                                            |
| Sondag 2011                                       | 2007-2008    | cross-sectional (BRFSS)       | US: Montana                 | Adult                 | ? (100)                 | <b>Proportion ever tested:</b> 39%                                                                                                                                                                                                                                                                                                                          |
| Takahashi 2011                                    | 2008         | cross-sectional               | US: S. California           | Adult                 | 179 (100)               | <b>Proportion ever tested:</b> 57 (31.8%)                                                                                                                                                                                                                                                                                                                   |
| Kwan 2012                                         | 2007-2010    | pre-post test                 | AUS: Western Australia      | Perinatal             | 390 (14.3)              | <b>Model:</b> Aboriginal people more likely to get STI/BBV testing according to guidelines (AOR: 7.45, 95%CI: 5.53-10.05)                                                                                                                                                                                                                                   |
| Bauer 2012                                        | 2009-2010    | cross-sectional (Trans Pulse) | CAN: Ontario                | Trans people          | 35 (8.1)                | <b>Proportion tested in past 6 months:</b> 8% (95%CI: 0-20%)<br><b>Proportion never tested:</b> 15% (95%CI: 3-36%)<br><b>Proportion tested in past year:</b> 66.7% (95%CI: 57.9-75.4%)<br><b>Proportion never/unsure if tested:</b> 20.7% (95%CI: 13.2-28.3%)                                                                                               |
| Paquette 2013                                     | 2008         | cross-sectional               | AUS: Sydney                 | Substance use         | 120 (20.4)              | <i>No difference compared to non-Indigenous</i>                                                                                                                                                                                                                                                                                                             |
| Ward 2013                                         | 2007-2008    | cross-sectional               | AUS: NSW                    | Youth                 | 293 (100)               | <b>Proportion tested for STIs incl. HIV in past year:</b> 58%                                                                                                                                                                                                                                                                                               |
| Pearson 2013                                      | 2005-2007    | cross-sectional               | US: 7 cities                | MSM                   | 174 (100)               | <b>Proportion tested in past 3 months:</b> 67 (45.6%)                                                                                                                                                                                                                                                                                                       |
| Sionean 2014                                      | 2010         | cross-sectional (NHBS)        | US: National                | Heterosexual          | 56 (0.6)                | <b>Proportion tested in past year:</b> 14/56 (25%); (men: 25%; women: 25)<br><b>Proportion ever tested:</b> 42/56 (75%); (men: 67%; women: 81)                                                                                                                                                                                                              |
| Long 2014                                         | 2003-2012    | cohort (population)           | CAN: Alberta                | Co-morbid (TB)        | 182 (12.5)              | <b>Proportion tested in routine screening in TB care:</b> 167/182 (91.8%)                                                                                                                                                                                                                                                                                   |
| Williams 2015                                     | 2010         | cross-sectional               | AUS: Western Australia      | Youth                 | 244 (100)               | <b>Proportion tested in past year:</b> 31%<br><b>Proportion ever tested:</b> 46%                                                                                                                                                                                                                                                                            |
| Nwangwu-Ike 2015                                  | 2012         | cohort (NHSS)                 | US: National                | Women                 | 731 (0.3)               | <b>Late diagnosis (Stage 3 AIDS at diagnosis):</b> AI/AN: 15 (34.1%) Native Hawaiian: 4 (40%)<br><b>Proportion tested in past year:</b> 101 (6.5%)<br><b>Model:</b> Odds of recent HIV testing higher for AI/AN 50-54 (AOR:2.47; 95%CI:1.09-5.58) and 60-64 (AOR:2.99; 95%CI:1.50-5.97) vs white people the same age. No differences among 55-59 year olds. |
| Ford 2015                                         | 2010         | cross-sectional (BRFSS)       | US: National                | Older adults          | 1542 (1.1)              |                                                                                                                                                                                                                                                                                                                                                             |
| Ward 2016                                         | 2010-2014    | trial (STRIVE)                | AUS: 65 remote communities  | Young people          | 15260 STI tests (100)   | <b>Proportion tested within 30 days of positive STI test:</b> 4858/15260 (31.8%)                                                                                                                                                                                                                                                                            |
| Anastario 2017                                    | ?            | cross-sectional               | US: Fort Peck               | Substance use         | 51 (100)                | <b>Proportion tested in past year:</b> 66%                                                                                                                                                                                                                                                                                                                  |
| Cahn 2017                                         | 2006-2010    | cross-sectional (NSFG)        | US: National                | Men                   | 923 (14.8)              | <b>Proportion tested in past year:</b> 11.5%                                                                                                                                                                                                                                                                                                                |

## LINKAGE TO CARE

| First Author,<br>Publication Year | Study<br>period | Study design                        | Location                      | Population                  | Sample              | Key cascade findings                                                                                                                                                                                                                                                                                                                                                                                                     |
|-----------------------------------|-----------------|-------------------------------------|-------------------------------|-----------------------------|---------------------|--------------------------------------------------------------------------------------------------------------------------------------------------------------------------------------------------------------------------------------------------------------------------------------------------------------------------------------------------------------------------------------------------------------------------|
|                                   |                 |                                     |                               |                             | Indigenous<br>n (%) |                                                                                                                                                                                                                                                                                                                                                                                                                          |
| Diamond 2001                      | 1989-1998       | chart review                        | US: Seattle /<br>Denver / LA  | PLWHA                       | 151 (1.3)           | <b>Presented late (AIDS diagnosis):</b> 58 (38.0%)<br><i>Significantly less likely than non-Indigenous p=0.07</i>                                                                                                                                                                                                                                                                                                        |
| Plitt 2009                        | 1998-2003       | cohort (NAHIVP)                     | CAN: Northern<br>Alberta      | newly<br>diagnosed<br>PLWHA | 216 (41.1)          | <b>Median time to care (days):</b> 38 (95%CI: 30-44)<br><b>Model:</b> Aboriginal ethnicity marginally significant correlate of longer times to care (AHR: 0.82; 95% CI 0.68-1.01)                                                                                                                                                                                                                                        |
| Prentice 2011                     | 2004-2005       | cross-sectional                     | CAN: National                 | Youth                       | 413 (100)           | <b>Never accessed care following diagnosis:</b> 13/25 (52%)<br><b>Range of time to care:</b> within 3 months to after 2 years<br><b>Presented late (CD4 &lt;350 cells/mL or AIDS-defining event):</b> 30/65 (46.1%)<br>MSM: 20/49 (40.8%); hetero: 10/16 (62.5%)<br><b>Model:</b> Maori MSM were more likely to present to care with 'advanced HIV disease' compared with European settler MSM (RR: 2.1, 95%CI: 1.4-3.2) |
| Dickson 2012                      | 2005-2010       | cohort (AIDS<br>Epidemiology Group) | NZ: National                  | PLWHA                       | 65 (8.6)            | <b>Presented late (CD4 &lt;200/<math>\mu</math>L):</b> 27 (24%)                                                                                                                                                                                                                                                                                                                                                          |
| Connel 2014                       | ?               | chart review                        | US: Oklahoma                  | APHA                        | 112 (100)           | <b>&gt;=1 lab test within 3 mo of diagnosis</b><br>AI/AN: 4 (100%)<br>Native Hawaiian: 4 (80.0%)                                                                                                                                                                                                                                                                                                                         |
| Nwangwu-Ike 2015                  | 2012            | cohort (NHSS)                       | US: National                  | Women                       | 731 (0.3)           | <b>Model:</b> Indigenous women more likely to have never accessed care (aOR: 4.30; 95%CI: 1.31-14.13) and to have delayed linkage to care (aOR: 2.04; 95%CI: 1.42-2.92), vs. Caucasian women.                                                                                                                                                                                                                            |
| Kronfli 2017                      | 2013-2015       | cross-sectional<br>(CHIWOS)         | CAN: BC /<br>Ontario / Quebec | Women                       | 288 (20.2)          | <b>&gt;=1 lab test within 1mo of diagnosis among those diagnosed in 2013:</b> 43/58 (74.1%)                                                                                                                                                                                                                                                                                                                              |
| Mitsch 2017                       | 2011-2013       | cross-sectional<br>(NHSS)           | US: 28<br>jurisdictions       | APHA                        | 1233 (100)          |                                                                                                                                                                                                                                                                                                                                                                                                                          |

## RETENTION IN CARE

| First Author,<br>Publication Year | Study<br>period | Study design                            | Location                         | Population         | Sample              | Key Cascade Findings                                                                                                                                                                                                                                                                                                                                                                                                                                                                                                   |
|-----------------------------------|-----------------|-----------------------------------------|----------------------------------|--------------------|---------------------|------------------------------------------------------------------------------------------------------------------------------------------------------------------------------------------------------------------------------------------------------------------------------------------------------------------------------------------------------------------------------------------------------------------------------------------------------------------------------------------------------------------------|
|                                   |                 |                                         |                                  |                    | Indigenous<br>n (%) |                                                                                                                                                                                                                                                                                                                                                                                                                                                                                                                        |
| Duran 2000                        | 1997-1998       | cross-sectional                         | US: Western                      | rural APHA         | 28 (100)            | <b>Received medical care in the past 4 months:</b> 24 (86%)<br><b>Avg. number of clinic visits:</b> 4                                                                                                                                                                                                                                                                                                                                                                                                                  |
| Diamond 2001                      | 1989-1998       | chart review                            | US: Seattle /<br>Denver / LA     | PLWHA              | 151 (1.3)           | <b>Mean annual outpatient visits:</b> 13<br><i>Significantly lower than non-Indigenous p=0.001</i>                                                                                                                                                                                                                                                                                                                                                                                                                     |
| Grierson 2004                     | 2001-2002       | cross-sectional (HIV<br>Futures Survey) | NZ: National                     | APHA               | 25 (100)            | <b>Ever received VL monitoring:</b> 23/25 (92.0%)<br><b>Avg. frequency of VL monitoring past year:</b> 3.1                                                                                                                                                                                                                                                                                                                                                                                                             |
| Martin 2010                       | 1999-2005       | cohort (NAHIVP)                         | CAN: Northern<br>Alberta         | ART naïve<br>PLWHA | 172 (37.3)          | <b>No viral load monitoring in 6-months after baseline:</b> 28/172 (16%)<br><i>Significantly higher than non-Indigenous (p=0.0059)</i>                                                                                                                                                                                                                                                                                                                                                                                 |
| Erickson 2015                     | ? - 2013        | chart review                            | CAN: Winnipeg                    | PLWHA              | 218 (38.7)          | <b>Odds of missing at least one appointment</b><br>Aboriginal: AOR: 1.2; 95%CI: 0.7-2.1<br>Aboriginal PWUD: AOR: 3.33; 95%CI: 1.39-7.97<br><b>Laboratory monitoring (CD4):</b> 2.76 tests/year<br><i>Significantly lower than non-Indigenous p=0.025</i>                                                                                                                                                                                                                                                               |
| Templeton 2015                    | 1999-2013       | cohort                                  | AUS: National                    | PLWHA              | 42 (1.9)            | <b>Laboratory monitoring (VL):</b> 2.53 tests/year<br><i>Significantly lower than non-Indigenous p&lt;0.001</i><br><b>&gt;=1 lab tests in 2011</b><br>AI/AN: 65 (47.1%)<br>Native Hawaiian: 47 (51.6%)<br><b>Model:</b> AI/AN women less likely than white to have 1+ lab test (PR: 0.74; 95%CI:0.62-0.88)<br><b>&gt;=2 lab tests at least 3 months apart</b><br>AI/AN: 46 (33.3%)<br>Native Hawaiian: 34 (37.4%)<br><b>Model:</b> AI/AN women less likely than white to have 2+ lab tests (PR: 0.70; 95%CI:0.55-0.89) |
| Nwangwu-Ike 2015                  | 2011            | cohort (NHSS)                           | US: National                     | Women              | 731 (0.3)           | <b>Model:</b> No significant differences between Indigenous vs. Caucasian women in terms of having been linked to care but not having received HIV medical care in the past year.                                                                                                                                                                                                                                                                                                                                      |
| Kronfli 2017                      | 2013-2015       | cross-sectional<br>(CHIWOS)             | CAN: BC /<br>Ontario /<br>Quebec | Women              | 288 (20.2)          | <b>&gt;=2 CD4 or VL tests &gt;=3 months apart in 2012:</b> 551/1175 (46.9%)<br><b>Continuous care</b> (>=2 VL result >=90 days apart/yr): 103/175 (58.9%)<br><b>Discontinuous care</b> (>=1 yr with only 1 VL result): 55/175 (31.4%)<br><b>Gap in care</b> (a yr without a VL result): 17/175 (9.7%)                                                                                                                                                                                                                  |
| Mitsch 2017                       | 2011-2013       | cross-sectional<br>(NHSS)               | US: 28<br>jurisdictions          | APHA               | 1233 (100)          | <b>Model:</b> Indigenous more likely to experience discontinuous care (aOR: 1.91; 95% CI: 1.28-2.84) vs. White.                                                                                                                                                                                                                                                                                                                                                                                                        |
| Rachlis 2017                      | 2009-2012       | cohort (OHTN)                           | CAN: 10 clinics                  | PLWHA              | 175 (9.5)           |                                                                                                                                                                                                                                                                                                                                                                                                                                                                                                                        |

## ART INITIATION

| First Author,<br>Publication Year | Study<br>period | Study design                            | Location                     | Population                | Sample              | Key Cascade Finding                                                                                                                                                                                                                              |
|-----------------------------------|-----------------|-----------------------------------------|------------------------------|---------------------------|---------------------|--------------------------------------------------------------------------------------------------------------------------------------------------------------------------------------------------------------------------------------------------|
|                                   |                 |                                         |                              |                           | Indigenous<br>n (%) |                                                                                                                                                                                                                                                  |
| Goldstone 2000                    | 1997            | chart review                            | CAN: Vancouver               | PLWHA who died            | 10 (16.1)           | <b>Ever on ART:</b> 7 (70%)<br><i>Not different than non-Indigenous p=0.540</i><br><b>Duration on ART (median days):</b> 97 (30-1416)<br><i>Significantly lower than non-Indigenous p=0.014</i>                                                  |
| Diamond 2001                      | 1989-1998       | chart review                            | US: Seattle /<br>Denver / LA | PLWHA                     | 151 (1.3)           | <b>on ART:</b> 56%<br><i>Not different than non-Indigenous p=0.8</i>                                                                                                                                                                             |
| Wood 2003                         | 1995-2001       | cohort                                  | CAN: BC                      | PLWHA who died            | 149 (12.0)          | <b>Ever on ART:</b> 81/149 (54.4%)<br><i>Significantly less than non-Indigenous p=0.001</i><br><b>Model:</b> Aboriginal people significantly less likely than other ethnicities to have ever received ART (AOR: 0.60; 95%CI: 0.41–0.87; p=0.008) |
| Grierson 2004                     | 2001-2002       | cross-sectional (HIV<br>Futures Survey) | NZ: National                 | APHA                      | 25 (100)            | <b>Never been on ART:</b> 7/25 (28.0%)<br><b>Currently on ART:</b> 16/24 (66.7%)                                                                                                                                                                 |
| Miller 2006                       | 1996-2002       | cohort (BC DTP)                         | CAN: BC                      | ART naïve<br>PLWHA        | 146 (16.4)          | <b>AIDS diagnosis at baseline:</b> 20 (14%)<br><i>Not different than non-Indigenous p=0.361</i>                                                                                                                                                  |
| Wood 2006                         | 1996-2003       | cohort (BART)                           | CAN: Vancouver               | Substance use             | 149 (47.8)          | <b>On ART at 2 years:</b> 29.2%<br><b>Model:</b> Aboriginal participants initiated ART at a significantly slower rate ARH: 0.37; 95%CI: 0.15-0.93; p=0.035                                                                                       |
| Gorgos 2006                       | -               | chart review                            | US: Phoenix                  | APHA                      | 235 (100)           | <b>Ever been on ART:</b> 146/185 (78.9%)<br><b>Ever been on HAART:</b> 129/185 (70.1%)<br><b>Currently on HAART:</b> 107/185 (59.1%)                                                                                                             |
| Newman 2007                       | 2003            | cross-sectional                         | AUS: Western<br>Australia    | APHA                      | 20 (100)            | <b>On ART:</b> 11/20 (55.0%)                                                                                                                                                                                                                     |
| Duran 2010                        | 2003-2007       | program evaluation                      | US: Navajo<br>Nation         | Case mgmt                 | 46 (100)            | <b>On ART:</b> 75%                                                                                                                                                                                                                               |
| Prentice 2011                     | 2004-2005       | cross-sectional                         | CAN: National                | Youth                     | 413 (100)           | <b>Ever on ART:</b> 6/25 (24.0%)<br><b>on ART:</b> 51/80 (64%)<br>First Nations: 60.0%; Metis or Inuit: 70.0%<br>men: 70%; women: 61%<br>lgbtq: 70%; hetero: 60%                                                                                 |
| Monette 2009 &<br>Beswick 2013    | 2006            | cross-sectional (PSHP)                  | CAN: Ontario                 | off-reserve<br>APHA       | 80 (100)            |                                                                                                                                                                                                                                                  |
| Cain 2013                         | -               | cross-sectional                         | CAN: National                | Co-morbid<br>(depression) | 72 (100)            | <b>Currently not on ART:</b> 28/72 (39%)                                                                                                                                                                                                         |
| Connel 2014                       | -               | chart review                            | US: Oklahoma                 | APHA                      | 112 (100)           | <b>On ART at baseline:</b> 35 (31%)                                                                                                                                                                                                              |
| Templeton 2015                    | 1999-2013       | cohort (prospective)                    | AUS: National                | PLWHA                     | 42 (1.9)            | <b>ART naïve at enrolment:</b> 14/42 (33.3%)<br><b>Currently not on ART:</b> 20%                                                                                                                                                                 |
| Jaworsky 2016                     | 2007-2011       | cross-sectional (OHTN)                  | CAN: Toronto                 | PLWHA                     | 70 (9.5)            | <i>Not different than Caucasian p=0.15</i>                                                                                                                                                                                                       |
| Klakowicz 2016                    | 2007-2012       | pre-post (VNHS)                         | CAN: Vancouver               | PLWHA                     | 323 (59.2)          | <b>Ever been on ART while a patient:</b> 280/323 (87%)<br><b>Ever been on ART at baseline:</b> 234/326 (71.8%)<br><b>On ART in past 6 months:</b> Increased from 51-94%                                                                          |
| Milloy 2016                       | 2005-2014       | cohort (ACCESS)                         | CAN: Vancouver               | Substance use             | 326 (38.6)          | <b>Model:</b> No difference in likelihood of Indigenous vs non-Indigenous participants being dispensed ART in the previous 180 days (aOR: 1.32; 95%CI: 0.92-1.89).                                                                               |

## ART ADHERENCE

| First Author,<br>Publication Year | Study<br>period | Study design                    | Location                   | Population      | Sample              |  | Key Cascade Finding                                                                                                                                                                                                                                                                                   |
|-----------------------------------|-----------------|---------------------------------|----------------------------|-----------------|---------------------|--|-------------------------------------------------------------------------------------------------------------------------------------------------------------------------------------------------------------------------------------------------------------------------------------------------------|
|                                   |                 |                                 |                            |                 | Indigenous<br>n (%) |  |                                                                                                                                                                                                                                                                                                       |
| Wood 2003                         | 1995-2001       | cohort                          | CAN: BC                    | PLWHA who died  | 149 (12.0)          |  | <b>Received ART &gt;=75% of the time:</b> 23/81 (28.4%)<br><b>Model:</b> No differences in time to ART discontinuation were observed by ethnicity (ARH:1.19; 95%CI:0.87-1.61)                                                                                                                         |
| Grierson 2004                     | 2001-2002       | sectional (HIV Futures Survey)  | NZ: National               | APHA            | 25 (100)            |  | <b>Avg. doses taken per day:</b> 2.4 (Range 0-6; Median: 2)<br><b>Ever took break from Tx:</b> 8/16 (50.0%)<br><b>5 day ratio:</b> 33 (83%)<br><b>SOAR:</b> 22 (55%)                                                                                                                                  |
| Ka'opua 2004                      | ?               | cross-sectional cohort (BC DTP) | US: Hawaii                 | PLWHA           | 40 (50.0)           |  | <i>No difference for either compared to White</i>                                                                                                                                                                                                                                                     |
| Miller 2006                       | 1996-2002       | cohort (BC DTP)                 | CAN: BC                    | ART naïve PLWHA | 146 (16.4)          |  | <b>Adherent in first year on ART:</b> 75-100%<br><i>Significantly lower than non-Indigenous p=0.001</i>                                                                                                                                                                                               |
| Lima 2006                         | 1996-1999       | cohort (BC DTP)                 | CAN: BC                    | ART naïve PLWHA | 88 (14.1)           |  | <b>Adherence &lt;95%:</b> 58/88 (66%)<br><i>No difference compared to non-Indigenous (p=0.2995)</i>                                                                                                                                                                                                   |
| Duran 2010                        | 2003-2007       | program evaluation              | USA: Navajo Nation         | Case mgmt       | 46 (100)            |  | <b>No missed doses in p4w:</b> 24/34 (71%)                                                                                                                                                                                                                                                            |
| Iralu 2010                        | 2004-2006       | cross-sectional                 | US: Southwest              | rural APHA      | 36 (100)            |  | <b>Excellent adherence:</b> 19/29 (61.3%)                                                                                                                                                                                                                                                             |
| Gunther 2014                      | 2010            | cross-sectional cohort study    | CAN: Edmonton              | PLWHA on ART    | 23 (35.4)           |  | <b>% doses taken in past week (mean, SE):</b> 91% (3)<br><b>% doses taken in past month (mean, SE):</b> 94% (2)<br><i>No difference compared to non-Indigenous</i>                                                                                                                                    |
| Samji 2014                        | 2007-2010       | (LISA)                          | CAN: BC                    | PLWHA           | 211 (27.5)          |  | <b>Tx interruption &gt;=90 days:</b> 46 (21.8%)<br><b>Model:</b> Indigenous ethnicity not associated with Tx interruption                                                                                                                                                                             |
| Samji 2015                        | 2000-2011       | cohort (CANOC)                  | CAN: BC / Ontario / Quebec | ART naïve PLWHA | 414 (5.4)           |  | <b>Tx interruption &gt;=90 days:</b> 242/414 (58.5%)<br><b>Model:</b> Higher risk of Tx interruption among Aboriginal vs non-Aboriginal (aHR: 1.67, 95%CI: 1.27-2.20)                                                                                                                                 |
| Milloy 2016                       | 2005-2014       | cohort (ACCESS)                 | CAN: Vancouver             | Substance use   | 326 (38.6)          |  | <b>Adherence &gt;=95% at baseline:</b> 107/326 (32.8%), remained similar over study period<br><b>Model:</b> No difference between Indigenous and non-Indigenous in adherence in past six months (aOR: 0.90; 95%CI: 0.73-1.10)                                                                         |
| Puskas 2017                       | 2000-2014       | cohort (HOMER)                  | CAN: BC                    | PLWHA           | 589 (13.0)          |  | <b>Adherence &gt;=95% (pharmacy refill), mean proportion (SD):</b><br>No IDU history: Men: 71.3 (5.4); Women: 59.5 (7.1)<br>With IDU history: Men: 77.1 (1.6); Women: 57.0 (2.3)<br><b>Model:</b> Indigenous people less likely to have optimal adherence compared to non-Indigenous people (p<0.001) |
| Wang 2017                         | 1996-2015       | cohort (BC DTP)                 | CAN: BC                    | PLWHA           | 1022 (12.6)         |  | <b>Tx interruption &gt;=90 days:</b> 617/1022 (60.4%)<br>Higher risk of Tx interruption among Aboriginal vs. non-Aboriginal (p<0.001)                                                                                                                                                                 |

## VIRAL SUPPRESSION

| First Author,<br>Publication Year | Study<br>period | Study design                                    | Location                      | Population         | Sample              | Key Cascade Finding                                                                                                                                                                                                                                                                                                                                                                                                   |
|-----------------------------------|-----------------|-------------------------------------------------|-------------------------------|--------------------|---------------------|-----------------------------------------------------------------------------------------------------------------------------------------------------------------------------------------------------------------------------------------------------------------------------------------------------------------------------------------------------------------------------------------------------------------------|
|                                   |                 |                                                 |                               |                    | Indigenous<br>n (%) |                                                                                                                                                                                                                                                                                                                                                                                                                       |
| Goldstone 2000                    | 1997            | chart review                                    | CAN: Vancouver                | PLWHA<br>who died  | 10 (16.1)           | <b>Median (IQR) viral load last reported:</b> 32,000 (22,000 - 54,000)                                                                                                                                                                                                                                                                                                                                                |
| Grierson 2004                     | 2001-2002       | cross-sectional<br>(HIV Futures<br>Survey)      | NZ: National                  | APHA               | 25 (100)            | <b>Mean copies/mL (range):</b> 558 (<500 to 2.5 million)<br><b>Median (IQR) viral load at baseline:</b> 71,950 (25,000-151,000)<br><b>Remain unsuppressed:</b> 24%                                                                                                                                                                                                                                                    |
| Miller 2006                       | 1996-2002       | cohort (BC DTP)                                 | CAN: BC                       | ART naïve<br>PLWHA | 146 (16.4)          | <b>Model:</b> Aboriginal ethnicity not associated with suppression.<br><b>Median (IQR) viral load at baseline:</b> 89,350 (21,750 – 185,000)                                                                                                                                                                                                                                                                          |
| Lima 2006                         | 1996-1999       | cohort (BC DTP)                                 | CAN: BC                       | ART naïve<br>PLWHA | 88 (14.1)           | <b>Significantly lower compared to non-Indigenous (p&lt;0.001)</b>                                                                                                                                                                                                                                                                                                                                                    |
| Gilles 2007                       | 1991-2005       | cohort (retrospective)                          | AUS: Western<br>Australia     | Perinatal          | 16 (39.0)           | <b>Proportion suppressed prior to delivery (&lt;50 copies/mL):</b> 11 (48%)<br><b>No difference compared to non-Indigenous (p=0.183)</b>                                                                                                                                                                                                                                                                              |
| Iralu 2010                        | 2004-2006       | cross-sectional                                 | US: Southwest                 | rural APHA         | 36 (100)            | <b>Median log viral load:</b> 2.3 (2.3, 7.3)<br><b>Median (IQR) copies/mL at baseline:</b> 105,000 (38,000-405,000)<br><b>Did not suppress within 6mo:</b> 65/172 (37.8%)<br><b>Model:</b> Odds of suppression (vs non-Aboriginal non-IDU)<br>Aboriginal IDU: OR:0.33, 95%CI:0.19-0.60, p=0.0002<br>Aboriginal non-IDU: OR:0.38, 95%CI:0.21-0.67, p=0.0009                                                            |
| Martin 2010                       | 1999-2005       | cohort (NAHIVP)                                 | CAN: Northern<br>Alberta      | ART naïve<br>PLWHA | 172 (37.3)          | <b>Median (IQR) copies/mL at baseline:</b> 100,000 (22,000-390,000)<br><b>No difference compared to non-Indigenous (p=0.46)</b>                                                                                                                                                                                                                                                                                       |
| Martin 2011                       | 1999-2005       | cohort (NAHIVP)                                 | CAN: Northern<br>Alberta      | ART naïve<br>PLWHA | 194 (35.4)          | <b>Median (IQR) copies/mL</b><br>Aboriginal IDU: 50 (50-44,000)<br>Aboriginal non-IDU: 50 (50-71)<br><b>Significantly higher (p=0.019)</b><br><b>&gt;400 copies/mL</b><br>Aboriginal IDU: 7 (33%)<br>Aboriginal non-IDU: 2 (15%)<br><b>Marginally higher (p=0.058)</b>                                                                                                                                                |
| Martin 2013                       | 2006-2007       | cross-sectional<br>(NAHIVP)                     | CAN: Northern<br>Alberta      | PLWHA              | 34 (35.4)           | <b>Median (IQR) copies/mL at baseline:</b> 71,100 (19,700-151,000)<br><b>Significantly lower than non-Indigenous (p&lt;0.001)</b>                                                                                                                                                                                                                                                                                     |
| ART-CC 2013                       | 1998-2009       | cohort (HOMER)                                  | CAN: BC                       | PLWHA              | 205 (0.4)           | <b>Proportion unsuppressed:</b> 78 (14%)<br><b>Significantly higher than non-Indigenous (p&lt;0.001)</b>                                                                                                                                                                                                                                                                                                              |
| Cescon 2014                       | 1997-2010       | cohort (BC DTP)                                 | CAN: BC                       | PLWHA              | 558 (9.1)           | <b>Mean (range) copies/mL:</b> 137,807 (43–750,000)                                                                                                                                                                                                                                                                                                                                                                   |
| Connel 2014                       | ?               | chart review                                    | US: Oklahoma                  | APHA               | 112 (100)           | <b>Proportion suppressed at entry into care:</b> 20/112 (17.9%)<br><b>Median (IQR) copies/mL at baseline:</b> 32,000 (8600-98000)<br><b>No VL sup within 6 mo of ART initiation:</b> 24/87 (27.5%)<br><b>Model:</b> Aboriginal less likely to suppress within 6mo of initiating ART vs. Canadian-born non-Aboriginal (AOR:0.44; 95%CI: 0.20-0.96; p=0.04). No difference in odds of virological failure by ethnicity. |
| Lefebvre 2014                     | 2006-2012       | cohort (NAHIVP)                                 | CAN: Northern<br>Alberta      | ART naïve<br>PLWHA | 87 (27.0)           | <b>Proportion suppressed (&lt;400 copies/ml 12mo post-ART):</b> 60.0%<br><b>Proportion suppressed (&lt;400 copies/ml 24mo post-ART):</b> 81.0%                                                                                                                                                                                                                                                                        |
| Templeton 2015                    | 1999-2013       | cohort (prospective)                            | AUS: National                 | PLWHA              | 42 (1.9)            | <b>No difference compared to non-Indigenous p=0.635</b>                                                                                                                                                                                                                                                                                                                                                               |
| Erickson 2015                     | ?               | chart review                                    | CAN: Winnipeg                 | Substance<br>use   | 218 (38.7)          | <b>Proportion never been suppressed:</b> 39/152 (25.7%)<br><b>Significantly more likely than non-Indigenous p=0.008</b><br><b>Proportion suppressed (&lt;=200 copies/mL)</b><br>All/AN: 41 (29.7%)<br>Native Hawaiian: 36 (39.6%)<br><b>Model:</b> All/AN less likely to be suppressed vs white (PR: 0.64; 95%CI: 0.49-0.83). No difference between Native Hawaiian and white.                                        |
| Nwangwu-Ike 2015                  | 2008-2012       | cohort (National<br>HIV Surveillance<br>System) | US: National                  | Women              | 731 (0.3)           | <b>Proportion suppressed:</b> 76%                                                                                                                                                                                                                                                                                                                                                                                     |
| Jaworsky 2016                     | 2007-2011       | cross-sectional<br>(OHTN)                       | CAN: Toronto                  | PLWHA              | 70 (9.5)            | <b>No difference compared to non-Indigenous p=0.88</b>                                                                                                                                                                                                                                                                                                                                                                |
| Klakowicz 2016                    | 2007-2012       | pre-post (VNHS)                                 | CAN: Vancouver                | PLWHA              | 323 (59.2)          | <b>Median (IQR) copies/mL at baseline:</b> 196 (35-16531)<br><b>Proportion suppressed within 1 year of HAART:</b> 128 (40%)<br><b>Proportion suppressed (&lt;50 copies/mL):</b> Increased from 23-65%                                                                                                                                                                                                                 |
| Milloy 2016                       | 2005-2014       | cohort (ACCESS)                                 | CAN: Vancouver                | Substance<br>use   | 326 (38.6)          | <b>Model:</b> No difference between Indigenous and non-Indigenous in terms of being undetectable (aOR: 1.15; 95%: 0.91-1.46)                                                                                                                                                                                                                                                                                          |
| Benoit 2017 (a)                   | 2000-2012       | cohort (CANOC)                                  | CAN: BC /<br>Ontario / Quebec | PLWHA              | 497 (7.0)           | <b>Log10 copies/mL at baseline:</b> 4.85 (4.38–5.00)<br><b>Suppression at 1yr after ART initiation:</b> 54%<br><b>Rebound at 1 yr after ART initiation:</b> 13%<br><b>Model:</b> Indigenous less likely to achieve suppression vs. Caucasian (aHR=0.58, 95% CI 0.50-0.68, p<0.0001). Risk of rebound not significantly different between Indigenous and Caucasian (aHR=1.03, 95% CI 0.84, 1.27, P=0.75).              |
| Benoit 2017 (b)                   | 2000-2012       | cohort (CANOC)                                  | CAN: BC /<br>Ontario / Quebec | PLWHA              | 497 (7.0)           |                                                                                                                                                                                                                                                                                                                                                                                                                       |
| Mitsch 2017                       | 2012            | cross-sectional<br>(NHSS)                       | US: 28<br>jurisdictions       | APHA               | 1233 (100)          | <b>Proportion suppressed (&lt;200 copies/mL):</b> 530/1175 (45.1%)                                                                                                                                                                                                                                                                                                                                                    |
